# Supplementary material for: Associations of Plasma Glucagon Levels with Estimated Glomerular Filtration Rate, Albuminuria and Diabetic Kidney Disease in Patients with Type 2 Diabetes Mellitus
Source: PubMed Central journal article supplement — Diabetes Metab J. 2021 Mar 23;45(6):868–79. doi: 10.4093/dmj.2020.0149 (PMC8640146; doi:10.4093/dmj.2020.0149), 2021-03-23
Supplement: dmj-2020-0149-suppl1.pdf [file dmj-2020-0149-suppl1.pdf]

**Supplementary Table 1.** Clinical characteristics of 471 patients with well-controlled T2DM (HbA1c <7.0%)

| Variables                          | Type 2 diabetes mellitus |                  |                   | F/ $\chi^2$ value | P value            |
|------------------------------------|--------------------------|------------------|-------------------|-------------------|--------------------|
|                                    | Total                    | Without DKD      | With DKD          |                   |                    |
| Number                             | 471                      | 344              | 127               | -                 | -                  |
| Age, yr                            | 55.65±11.62              | 54.67±11.73      | 58.31±10.91       | 3.045             | 0.002              |
| Female sex                         | 234 (49.7)               | 170 (49.4)       | 64 (50.4)         | 0.035             | 0.851              |
| BMI, kg/m <sup>2</sup>             | 25.58±3.70               | 25.37±3.64       | 26.14±3.84        | 1.997             | 0.046              |
| SBP, mm Hg                         | 134.4±17.8               | 131.9±16.1       | 141.1±20.2        | 5.106             | <0.001             |
| DBP, mm Hg                         | 78.4±10.0                | 78.0±9.6         | 79.4±11.1         | 1.428             | 0.154              |
| Diabetic duration, yr              | 5.29±4.39                | 5.04±4.23        | 5.98±4.74         | 2.082             | 0.038              |
| Glucose-lowering therapies         |                          |                  |                   |                   |                    |
| Diabetes drug-free                 | 160 (34.0)               | 121 (35.2)       | 39 (30.7)         | 0.825             | 0.364              |
| Insulin treatments                 | 52 (11.0)                | 33 (9.6)         | 19 (15.0)         | 2.721             | 0.099              |
| Insulin-secretagogues              | 161 (34.2)               | 112 (32.6)       | 49 (38.6)         | 1.496             | 0.221              |
| Metformin                          | 195 (41.4)               | 142 (41.3)       | 53 (41.7)         | 0.008             | 0.929              |
| Pioglitazone                       | 103 (21.9)               | 72 (20.9)        | 31 (24.4)         | 0.657             | 0.418              |
| AGIs                               | 88 (18.7)                | 64 (18.6)        | 24 (18.9)         | 0.005             | 0.942              |
| DPP-4Is                            | 74 (15.7)                | 52 (15.1)        | 22 (17.3)         | 0.341             | 0.559              |
| GLP-1RAs                           | 7 (1.5)                  | 5 (1.5)          | 2 (1.6)           | -                 | 1.000 <sup>a</sup> |
| Hypertension                       | 234 (49.7)               | 148 (43.0)       | 86 (67.7)         | 22.624            | <0.001             |
| Statin medication                  | 178 (37.8)               | 129 (37.5)       | 49 (38.6)         | 0.046             | 0.830              |
| TG, mmol/L                         | 1.62 (1.06–2.62)         | 1.54 (1.02–2.55) | 1.88 (1.22–3.04)  | 2.302             | 0.022              |
| TC, mmol/L                         | 4.34±0.96                | 4.29±0.90        | 4.48±1.11         | 1.922             | 0.055              |
| HDL-C, mmol/L                      | 1.15±0.32                | 1.17±0.31        | 1.10±0.33         | -2.126            | 0.034              |
| LDL-C, mmol/L                      | 2.51±0.79                | 2.46±0.73        | 2.66±0.93         | 2.397             | 0.017              |
| Serum UA, $\mu$ mol/L              | 316.2±96.8               | 306.1±94.6       | 343.6±97.6        | 3.783             | <0.001             |
| Serum albumin, g/L                 | 40.0±4.2                 | 40.2±4.0         | 39.5±4.6          | -1.506            | 0.133              |
| Haemoglobin, g/L                   | 134.1±16.8               | 134.6±16.5       | 132.5±17.5        | -1.133            | 0.258              |
| IS <sub>HOMAcp</sub>               | 3.11 (1.98–4.78)         | 3.19 (2.15–4.78) | 2.71 (1.65–4.67)  | -2.341            | 0.020              |
| AUC <sub>cp</sub> , ng/mL·hr       | 14.5±7.2                 | 14.1±6.7         | 15.6±8.2          | 2.047             | 0.041              |
| AUC <sub>glu</sub> , mmol/L·hr     | 33.3±8.6                 | 32.9±8.7         | 34.1±8.2          | 1.324             | 0.186              |
| HbA1c, %                           | 6.44±0.34                | 6.41±0.35        | 6.51±0.31         | 2.675             | 0.008              |
| Postchallenge 2-hr glucose, mmol/L | 12.76±1.69               | 12.64±1.71       | 13.08±1.60        | 2.567             | 0.011              |
| Fasting glucagon, pg/mL            | 125.1±29.1               | 123.0±27.4       | 130.8±32.5        | 2.616             | 0.009              |
| AUC <sub>glu</sub> , pg/mL·hr      | 410.4±169.3              | 391.1±152.9      | 462.8±198.9       | 4.148             | <0.001             |
| eGFR, mL/min/1.73 m <sup>2</sup>   | 95.8±24.4                | 100.3±21.2       | 83.7±28.1         | -6.681            | <0.001             |
| UACR, mg/g                         | 17.8 (13.4–29.4)         | 15.4 (12.4–19.0) | 62.6 (36.0–173.0) | 10.024            | <0.001             |
| Log <sub>10</sub> UACR, mg/g       | 1.39±0.45                | 1.19±0.15        | 1.94±0.52         | 24.250            | <0.001             |

Values are presented as mean ± standard deviation, number (%), or median (interquartile range). Student's *t*-test and chi-square test were applied to detect differences in their corresponding type of data, and corresponding test statistics (*F* and  $\chi^2$  values) were also provided.

T2DM, type 2 diabetes mellitus; HbA1c, glycosylated hemoglobin; DKD, diabetic kidney disease; BMI, body mass index; SBP, systolic blood pressure; DBP, diastolic blood pressure; AGI,  $\alpha$ -glucosidase inhibitor; DPP-4I, dipeptidyl peptidase-4 inhibitor; GLP-1RA, glucagon-like peptide-1 receptor agonist; TG, triglyceride; TC, total cholesterol; HDL-C, high-density lipoprotein cholesterol; LDL-C, low-density lipoprotein cholesterol; UA, uric acid; IS<sub>HOMAcp</sub>, homeostasis model assessment of insulin resistance using C-peptide; AUC<sub>cp</sub>, area under the C-peptide curve; AUC<sub>glu</sub>, area under the glucose curve; AUC<sub>glu</sub>, area under the glucagon curve; eGFR, estimated glomerular filtration rate; UACR, urinary albumin-to-creatinine ratio.

<sup>a</sup>Compared by Fisher's exact test.
