# Supplementary material for: Associations of Plasma Glucagon Levels with Estimated Glomerular Filtration Rate, Albuminuria and Diabetic Kidney Disease in Patients with Type 2 Diabetes Mellitus
Source: PubMed Central journal article supplement — Diabetes Metab J. 2021 Mar 23;45(6):868–79. doi: 10.4093/dmj.2020.0149 (PMC8640146; doi:10.4093/dmj.2020.0149), 2021-03-23
Supplement: dmj-2020-0149-suppl3.pdf [file dmj-2020-0149-suppl3.pdf]

**Supplementary Table 3.** Mean differences (B [95% CI]) in kidney damage indices among the quartiles of AUC<sub>glu</sub> in 471 patients with well-controlled T2DM (HbA1c <7.0%)

| Model                            | Q1           | Q2                        | Q3                        | Q4                        | P value for trend |
|----------------------------------|--------------|---------------------------|---------------------------|---------------------------|-------------------|
| AUC <sub>glu</sub> , pg/mL·hr    | 68–306       | 308–380                   | 381–482                   | 483–1,603                 | -                 |
| Number                           | 120          | 117                       | 116                       | 118                       | -                 |
| eGFR, mL/min/1.73 m <sup>2</sup> | 109.81±22.43 | 92.48±21.95               | 90.61±23.41               | 90.09±24.33               | <0.001            |
| Model 0                          | 0-reference  | -17.33 (-23.21 to -11.45) | -19.20 (-25.10 to -13.30) | -19.72 (-25.60 to -13.85) | <0.001            |
| Model 1                          | 0-reference  | -14.24 (-19.31 to -9.164) | -15.64 (-20.72 to -10.56) | -15.84 (-20.94 to -10.75) | <0.001            |
| Model 2                          | 0-reference  | -12.83 (-17.73 to -7.933) | -12.68 (-17.63 to -7.729) | -13.23 (-18.19 to -8.272) | <0.001            |
| Model 3                          | 0-reference  | -12.88 (-17.74 to -8.033) | -12.22 (-17.11 to -7.330) | -12.95 (-17.87 to -8.033) | <0.001            |
| Log <sub>10</sub> UACR, mg/g     | 1.191±0.376  | 1.355±0.394               | 1.463±0.494               | 1.557±0.438               | <0.001            |
| Model 0                          | 0-reference  | 0.164 (0.055 to 0.273)    | 0.273 (0.163 to 0.382)    | 0.367 (0.258 to 0.476)    | <0.001            |
| Model 1                          | 0-reference  | 0.140 (0.036 to 0.244)    | 0.253 (0.149 to 0.358)    | 0.347 (0.243 to 0.452)    | <0.001            |
| Model 2                          | 0-reference  | 0.117 (0.017 to 0.218)    | 0.199 (0.097 to 0.301)    | 0.278 (0.176 to 0.380)    | <0.001            |
| Model 3                          | 0-reference  | 0.107 (0.005 to 0.209)    | 0.188 (0.085 to 0.292)    | 0.277 (0.174 to 0.381)    | <0.001            |

Values are presented as range, number, mean ± standard deviation, or mean difference (95% confidence interval).

Model 0: crude; Model 1: adjusted for age, sex, diabetic duration, body mass index, systolic blood pressure, diastolic blood pressure, statins medication, and hypertension; Model 2: additionally adjusted for lipid profiles, serum uric acid, serum albumin, hemoglobin, homeostasis model assessment of insulin resistance using C-peptide, area under the C-peptide curve, area under the glucose curve, postchallenge 2-hour glucose, and HbA1c; Model 3: additionally adjusted for glucose-lowering therapies.

CI, confidence interval; AUC<sub>glu</sub>, area under the glucagon curve; T2DM, type 2 diabetes mellitus; HbA1c, glycosylated hemoglobin; eGFR, estimated glomerular filtration rate; UACR, urinary albumin-to-creatinine ratio.
