# Supplementary material for: Associations of Plasma Glucagon Levels with Estimated Glomerular Filtration Rate, Albuminuria and Diabetic Kidney Disease in Patients with Type 2 Diabetes Mellitus
Source: PubMed Central journal article supplement — Diabetes Metab J. 2021 Mar 23;45(6):868–79. doi: 10.4093/dmj.2020.0149 (PMC8640146; doi:10.4093/dmj.2020.0149), 2021-03-23
Supplement: dmj-2020-0149-suppl7.pdf [file dmj-2020-0149-suppl7.pdf]

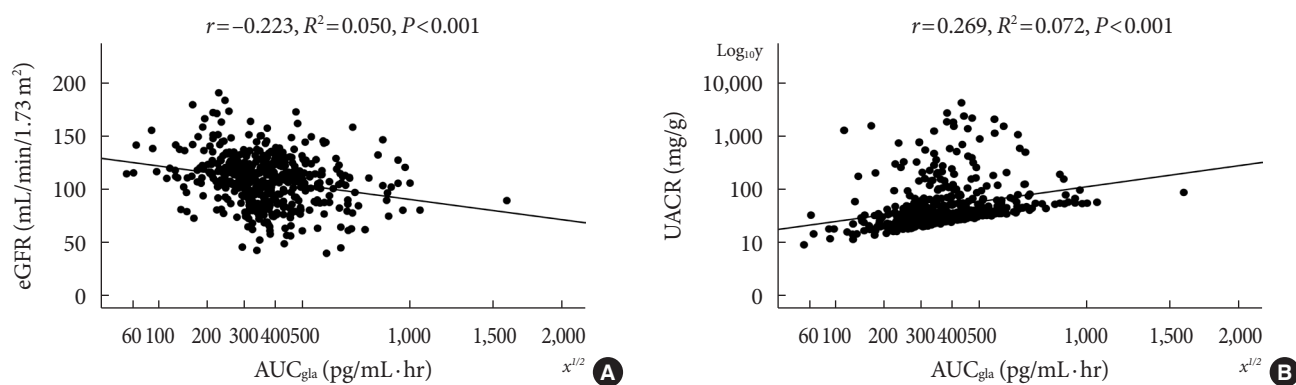

**Supplementary Fig. 3.** Scatter plot for the correlations of area under the glucagon curve ( $AUC_{gla}$ ) with kidney damage indices in 471 patients with glycosylated hemoglobin <7.0%. (A) Estimated glomerular filtration rate (eGFR). (B) Urinary albumin-to-creatinine ratio (UACR).
